# Supplementary material for: SwiftOrtho: A fast, memory-efficient, multiple genome orthology classifier
Source: PubMed Central journal article supplement (PMC6812468; doi:10.1093/gigascience/giz118), 2019-10-24
Supplement: giz118_reviewer_1_report_original_submission.pdf [file giz118_reviewer_1_report_original_submission.pdf]

## Reviewer Report

**Title:** SwiftOrtho: a Fast, Memory-Efficient, Multiple Genome Orthology Classifier

**Version:** Original Submission    **Date:** 3/14/2019

**Reviewer name:** Marnix Medema

### Reviewer Comments to Author:

The paper of Hu and Friedberg presents an interesting new method for large-scale identification of orthologous groups without the need for large-scale compute servers. The use of spaced seeds and reduced amino alphabets are innovative and interesting, and the method has a high precision across benchmarks, compared to its competitors. While the method is interesting and has added value, I think there are a number of ways in which the paper and the tool could be improved. I have ordered my recommendations in a few different categories.

#### Scientific:

\*   The key point of the paper seems to be that SwiftOrtho requires less memory and CPU compared to other tools, yet there is no figure or table that compares these characteristics across tools for datasets of different sizes. I would strongly recommend adding this to actually show the difference with each of the other tools.

\*   Line 227: SwiftOrtho is compared to BlastP, but not to other fast equivalents such as Diamond or Usearch. I think this comparison should be added, to show the added value of the method compared to the current state of the art.

#### General writing:

\*   The introduction does not read fluently. It is a bit 'staccato', without clear connections and transitions between the parts. I think this can use some editing to more clearly describe the field, its relevance (which is only explained in vague terms at the moment), the state of the art, the challenge and the contribution by the authors.

\*   It is surprising that the methodology for orthology classification (which is what makes it fast and memory-efficient) is not mentioned in the abstract.

\*   Line 14: Inparanoid is mentioned without introducing it.

\*   The figures could use a make-over, e.g. by removing horizontal/vertical skewing, changing fonts and applying a more pleasing color scheme.

\*   It would be very helpful to have a flowchart-like figure that outlines the different steps taken by the SwiftOrtho algorithm.

\*   Some of the figures (e.g., Fig 3a) are unnecessary, as they explain things that can safely be assumed to be textbook knowledge.

\*   The use of horizontal scales in Figure 6 is puzzling, e.g. the -0.200 lower end for Fig. 6D. Also, this makes OrthoFinder look unrealistically bad in panel F.

#### Grammar/spelling:

A thorough round of copy-editing would be highly recommended, as there are several spelling/grammar/style issues throughout. Some examples are:



If you can answer no to all of the above, write 'I declare that I have no competing interests' below. If your reply is yes to any, please give details below.

I declare that I have no competing interests.

I agree to the open peer review policy of the journal. I understand that my name will be included on my report to the authors and, if the manuscript is accepted for publication, my named report including any attachments I upload will be posted on the website along with the authors' responses. I agree for my report to be made available under an Open Access Creative Commons CC-BY license (<http://creativecommons.org/licenses/by/4.0/>). I understand that any comments which I do not wish to be included in my named report can be included as confidential comments to the editors, which will not be published.

Choose an item.

To further support our reviewers, we have joined with Publons, where you can gain additional credit to further highlight your hard work (see: <https://publons.com/journal/530/gigascience>). On publication of this paper, your review will be automatically added to Publons, you can then choose whether or not to claim your Publons credit. I understand this statement.

Yes Choose an item.
